# Supplementary material for: Enriching NLO efficacy via designing non-fullerene molecules with the modification of acceptor moieties into ICIF2F: an emerging theoretical approach
Source: Royal Society of Chemistry journal article supplement (doi:10.1039/d2ra01127a), 2022-01-01
Supplement: d2ra01127a1.pdf [file d2ra01127a1.pdf]

## Supplementary Information

### Enriching NLO Efficacy *via* Designing of Non-Fullerene Molecules with Modification of Acceptor Moieties into ICIF2F: An Emerging Theoretical Approach

Muhammad Khalid<sup>\*1</sup>, Muhammad Nadeem Arshad<sup>2,3</sup>, Shahzad Murtaza<sup>1,4</sup>, Iqra Shafiq<sup>1</sup>, Muhammad Haroon<sup>5</sup>, Abdullah M. Asiri<sup>2,3</sup>, Sara Figueirêdo de AlcântaraMorais,<sup>6</sup> Atualpa A. C. Braga,<sup>6</sup>

<sup>1</sup>Department of Chemistry, Khwaja Fareed University of Engineering & Information Technology, Rahim Yar Khan, 64200, Pakistan

<sup>2</sup>Chemistry Department, Faculty of Science, King Abdulaziz University, Jeddah 21589, P.O. Box 80203, Saudi Arabia.

<sup>3</sup>Center of Excellence for Advanced Material Research (CEAMR), King Abdulaziz University, Jeddah 21589, P.O. Box 80203, Saudi Arabia.

<sup>4</sup>Department of Chemistry, University of Gujrat, Gujrat 50700, Pakistan

<sup>5</sup>Department of Chemistry, Government Major Muhammad Afzal Khan (Shaheed), Boys Degree College Afzalpur, Mirpur, (Affiliated with Mirpur University of Science and Technology (MUST), 10250-Mirpur (AJK) Pakistan).

<sup>6</sup>Departamento de Química Fundamental, Instituto de Química, Universidade de São Paulo, Av. Prof. Lineu Prestes, 748, São Paulo, 05508-000, Brazil.

\*Corresponding authors E-mail addresses:

Dr. Muhammad Khalid ([muhammad.khalid@kfueit.edu.pk](mailto:muhammad.khalid@kfueit.edu.pk); [khalid@iq.usp.br](mailto:khalid@iq.usp.br))

**Table S1:** Wave length, excitation energy and oscillator strength of reference compound (NFAR1) and investigated compound (NFAD2-NFAD6).

| Compounds | $\lambda$ (nm) | E (eV) | f     | MO contributions                                                                                            |
|-----------|----------------|--------|-------|-------------------------------------------------------------------------------------------------------------|
| NFAR1     | 704.336        | 1.760  | 2.645 | H $\rightarrow$ L (95%), H-1 $\rightarrow$ L+1 (3%)                                                         |
|           | 555.137        | 2.233  | 0.216 | H $\rightarrow$ L+1 (92%), H-1 $\rightarrow$ L (2%)                                                         |
|           | 500.542        | 2.477  | 0.066 | H-1 $\rightarrow$ L (84%), H $\rightarrow$ L+1 (3%), H $\rightarrow$ L+2 (8%)                               |
|           | 496.354        | 2.498  | 0.024 | H $\rightarrow$ L+2 (80%), H-1 $\rightarrow$ L (9%), H-1 $\rightarrow$ L+2 (4%)                             |
|           | 451.689        | 2.745  | 0.147 | H $\rightarrow$ L+3 (84%), H-1 $\rightarrow$ L+2 (2%), H-1 $\rightarrow$ L+3 (6%)                           |
|           | 433.360        | 2.861  | 0.171 | H-1 $\rightarrow$ L+1 (87%), H $\rightarrow$ L (4%)                                                         |
| NFAD2     | 797.069        | 1.556  | 1.588 | H $\rightarrow$ L (94%), H-1 $\rightarrow$ LUMO (4%)                                                        |
|           | 597.313        | 2.076  | 0.500 | H-1 $\rightarrow$ L (89%), H-2 $\rightarrow$ L (3%), H $\rightarrow$ L (5%)                                 |
|           | 562.414        | 2.205  | 0.091 | H-1 $\rightarrow$ L+1 (11%), H $\rightarrow$ L+1 (85%)                                                      |
|           | 473.819        | 2.617  | 0.212 | H $\rightarrow$ L+2 (82%), H-2 $\rightarrow$ L (2%), H-1 $\rightarrow$ L+1 (3%), H-1 $\rightarrow$ L+2 (8%) |

|              |         |       |       |                                                     |
|--------------|---------|-------|-------|-----------------------------------------------------|
|              | 461.302 | 2.688 | 0.017 | H-1→L+1 (76%), H→L+1(12%), H-2→L+1 (6%), H→L+2 (3%) |
|              | 457.388 | 2.711 | 0.080 | H-2→L (90%), H-1→L (2%), H→L+2 (3%)                 |
| <b>NFAD3</b> | 810.301 | 1.530 | 1.578 | H→L (95%), H-1→L (4%)                               |
|              | 605.658 | 2.047 | 0.525 | H-1→L (89%), H-2→L (3%), H→L (5%)                   |
|              | 573.921 | 2.160 | 0.096 | H-1→L+1 (10%) H→L+1 (86%), H-1→L (2%)               |
|              | 474.272 | 2.614 | 0.175 | H→L+2 (74%), H-2→L (5%), H-1→L+1 (8%), H-1→L+2 (7%) |
|              | 468.236 | 2.648 | 0.030 | H-1→L+1 (72%) H→L+1 (11%) H-2→L+1 (5%), H→L+2 (8%)  |
|              | 462.145 | 2.683 | 0.099 | H-2→L (87%), H→L+2 (7%)                             |
| <b>NFAD4</b> | 946.155 | 1.310 | 1.325 | H→L (96%), H-1→L (3%)                               |
|              | 787.852 | 1.574 | 0.306 | H→L+1 (92%), H-1→L+1 (7%)                           |
|              | 676.474 | 1.833 | 0.479 | H-1→L (91%), H-2→L (3%), H→L (3%)                   |
|              | 594.563 | 2.085 | 0.124 | H-1→L+1 (86%), H-2→L+1 (5%), H→L+1 (8%)             |
|              | 562.899 | 2.203 | 0.307 | H→L+2 (90%), H-1→L (3%), H-1→L+2 (5%)               |
|              | 499.051 | 2.484 | 0.047 | H-2→L (91%), H-1→L (2%)                             |
| <b>NFAD5</b> | 936.861 | 1.323 | 0.872 | H→L (95%), H-1→L (4%)                               |
|              | 864.785 | 1.434 | 0.716 | H→L+1 (94%), H-1→L+1 (5%)                           |
|              | 673.864 | 1.840 | 0.294 | H-1→L (89%), H-2→L (4%), H→L (4%)                   |
|              | 633.574 | 1.957 | 0.374 | H-1→L+1 (87%), H-2→L+1 (4%), H→L+1 (5%)             |
|              | 574.027 | 2.160 | 0.208 | H→L+2 (90%), H-1→L+2 (4%)                           |
|              | 511.043 | 2.426 | 0.015 | H→L+3 (86%), H-1→L+3 (4%), H→L+4 (6%)               |
| <b>NFAD6</b> | 868.662 | 1.427 | 1.533 | H→L (96%), H-1→L (3%)                               |
|              | 653.822 | 1.896 | 0.243 | H→L+1 (87%), H-1→L+1 (9%)                           |
|              | 635.230 | 1.952 | 0.440 | H-1→L (90%), H-2→L (3%), H→L (3%), H→L+1 (2%)       |
|              | 518.134 | 2.393 | 0.038 | H-1→L+1 (83%), H→L+1 (10%), H-2→L+1 (5%)            |
|              | 507.945 | 2.441 | 0.249 | H→L+2 (88%), H-1→L (2%), H-1→L+2 (6%)               |
|              | 479.982 | 2.583 | 0.066 | H-2→L (91%), H-1→L (2%), H→L+2 (2%)                 |

**Table S2:** Natural bond orbital (NBO) analysis of investigated compound **NFAR1**-NBO by using M06 6-311G(d,p).

| <b>Donor(i)</b> | <b>Type</b> | <b>Acceptor(j)</b> | <b>Type</b> | <b>E(2)<sup>a</sup></b> | <b>E(J)E(i)<sup>b</sup>(a.u)</b> | <b>F(I,j)<sup>c</sup>(a.u)</b> |
|-----------------|-------------|--------------------|-------------|-------------------------|----------------------------------|--------------------------------|
| C14-C15         | π           | C39-C47            | π*          | 31.09                   | 0.31                             | 0.088                          |
| C61-C63         | π           | C74-C82            | π*          | 29.1                    | 0.33                             | 0.087                          |
| C74-C82         | π           | C89-C90            | π*          | 26.89                   | 0.30                             | 0.08                           |
| C42-C43         | π           | C44-C45            | π*          | 20.76                   | 0.30                             | 0.072                          |
| C3-C4           | π           | C7-C18             | π*          | 19.33                   | 0.32                             | 0.072                          |
| C60-C95         | π           | C62-C64            | π*          | 14.97                   | 0.32                             | 0.067                          |
| C54-C55         | π           | C41-C46            | π*          | 8.83                    | 0.33                             | 0.05                           |
| C87-O88         | π           | C74-C82            | π*          | 3.65                    | 0.43                             | 0.038                          |
| C62-C64         | π           | C62-C64            | π*          | 1.81                    | 0.29                             | 0.021                          |
| C12-C13         | π           | C12-C13            | π*          | 0.97                    | 0.30                             | 0.016                          |
| C91-N92         | π           | C93-N94            | π*          | 0.69                    | 0.47                             | 0.016                          |
| C74-H75         | σ           | C63-S65            | σ*          | 10.37                   | 0.72                             | 0.077                          |
| C39-H40         | σ           | C14-S36            | σ*          | 10.25                   | 0.71                             | 0.076                          |
| C90-C93         | σ           | C93-N94            | σ*          | 8.21                    | 1.61                             | 0.103                          |

|         |          |         |            |       |      |       |
|---------|----------|---------|------------|-------|------|-------|
| C14-C15 | $\sigma$ | C9-C13  | $\sigma^*$ | 7.16  | 1.16 | 0.082 |
| C14-C39 | $\sigma$ | C39-C47 | $\sigma^*$ | 6.56  | 1.35 | 0.084 |
| C89-C90 | $\sigma$ | C90-C93 | $\sigma^*$ | 6.09  | 1.27 | 0.079 |
| C1-C64  | $\sigma$ | C62-C64 | $\sigma^*$ | 5.95  | 1.29 | 0.079 |
| C41-C54 | $\sigma$ | C54-C55 | $\sigma^*$ | 3.71  | 1.26 | 0.061 |
| C5-C24  | $\sigma$ | C20-H23 | $\sigma^*$ | 1.66  | 1.01 | 0.037 |
| C5-C24  | $\sigma$ | C6-C7   | $\sigma^*$ | 1.11  | 1.17 | 0.032 |
| C5-C20  | $\sigma$ | C3-C4   | $\sigma^*$ | 0.92  | 1.19 | 0.03  |
| C63-C74 | $\sigma$ | C63-S65 | $\sigma^*$ | 0.62  | 0.93 | 0.021 |
| C14-S36 | $\sigma$ | C14-C39 | $\sigma^*$ | 0.50  | 1.21 | 0.022 |
| O69     | LP(2)    | C67-O68 | $\pi^*$    | 49.01 | 0.37 | 0.121 |
| S66     | LP(2)    | C61-C63 | $\pi^*$    | 32.64 | 0.24 | 0.084 |
| S37     | LP(2)    | C3-C4   | $\pi^*$    | 27.16 | 0.28 | 0.079 |
| S36     | LP(2)    | C14-C15 | $\pi^*$    | 22.64 | 0.26 | 0.069 |
| S66     | LP(2)    | C60-C95 | $\pi^*$    | 21.56 | 0.27 | 0.068 |
| F86     | LP(3)    | C79-C80 | $\pi^*$    | 20.69 | 0.44 | 0.093 |
| O68     | LP(2)    | C67-O69 | $\sigma^*$ | 34.23 | 0.66 | 0.136 |
| O88     | LP(2)    | C76-C87 | $\sigma^*$ | 21.31 | 0.76 | 0.115 |
| N94     | LP(1)    | C90-C93 | $\sigma^*$ | 12.63 | 1.04 | 0.103 |
| O69     | LP(2)    | C70-H72 | $\sigma^*$ | 4.89  | 0.72 | 0.056 |
| S37     | LP(1)    | C4-C7   | $\sigma^*$ | 0.95  | 1.19 | 0.030 |
| S65     | LP(1)    | C63-C74 | $\sigma^*$ | 0.51  | 1.22 | 0.022 |

**Table S3:** Natural bond orbital (NBO) analysis of investigated compound **NFAD2**-NBO by using M06 6-311G(d,p).

| <b>Donor(i)</b> | <b>Type</b> | <b>Acceptor(j)</b> | <b>Type</b> | <b>E(2)<sup>a</sup></b> | <b>E(J)E(i)<sup>b</sup>(a.u)</b> | <b>F(I,j)<sup>c</sup>(a.u)</b> |
|-----------------|-------------|--------------------|-------------|-------------------------|----------------------------------|--------------------------------|
| C48-C50         | $\pi$       | C61-C69            | $\pi^*$     | 30.51                   | 0.32                             | 0.089                          |
| C41-C42         | $\pi$       | C39-C40            | $\pi^*$     | 28.44                   | 0.30                             | 0.082                          |
| C39-C40         | $\pi$       | C43-C84            | $\pi^*$     | 24.44                   | 0.30                             | 0.077                          |
| C1-C2           | $\pi$       | C49-C51            | $\pi^*$     | 21.93                   | 0.28                             | 0.075                          |
| C66-C67         | $\pi$       | C63-C68            | $\pi^*$     | 20.97                   | 0.33                             | 0.075                          |
| C10-C11         | $\pi$       | C12-C13            | $\pi^*$     | 15.51                   | 0.29                             | 0.061                          |
| C49-C51         | $\pi$       | C1-C2              | $\pi^*$     | 12.85                   | 0.30                             | 0.056                          |
| C76-C77         | $\pi$       | C61-C69            | $\pi^*$     | 8.06                    | 0.33                             | 0.047                          |
| C54-O55         | $\pi$       | C47-C82            | $\pi^*$     | 3.52                    | 0.41                             | 0.037                          |
| C78-N79         | $\pi$       | C80-N81            | $\pi^*$     | 0.71                    | 0.47                             | 0.016                          |
| C61-H62         | $\sigma$    | C50-S52            | $\sigma^*$  | 10.61                   | 0.72                             | 0.078                          |
| C77-C78         | $\sigma$    | C78-N79            | $\sigma^*$  | 8.21                    | 1.61                             | 0.103                          |
| C6-C7           | $\sigma$    | C4-S37             | $\sigma^*$  | 7.67                    | 0.90                             | 0.074                          |
| C47-S53         | $\sigma$    | C82-F83            | $\sigma^*$  | 6.62                    | 0.95                             | 0.071                          |
| C47-C82         | $\sigma$    | C49-C51            | $\sigma^*$  | 5.05                    | 1.31                             | 0.073                          |

|         |          |         |            |       |      |       |
|---------|----------|---------|------------|-------|------|-------|
| C10-C18 | $\sigma$ | C7-C18  | $\sigma^*$ | 4.96  | 1.29 | 0.072 |
| C67-C68 | $\sigma$ | C66-C67 | $\sigma^*$ | 3.82  | 1.27 | 0.063 |
| C42-N86 | $\sigma$ | C41-C42 | $\sigma^*$ | 2.35  | 1.38 | 0.051 |
| C10-C11 | $\sigma$ | C9-C10  | $\sigma^*$ | 2.27  | 1.11 | 0.045 |
| C48-S53 | $\sigma$ | C48-C50 | $\sigma^*$ | 1.75  | 1.24 | 0.042 |
| C67-F72 | $\sigma$ | C63-C68 | $\sigma^*$ | 1.11  | 1.68 | 0.039 |
| C14-S36 | $\sigma$ | C9-C13  | $\sigma^*$ | 0.52  | 1.11 | 0.022 |
| N86     | LP(1)    | C41-C42 | $\pi^*$    | 48.70 | 0.29 | 0.109 |
| O56     | LP(2)    | C54-O55 | $\pi^*$    | 48.64 | 0.37 | 0.121 |
| S53     | LP(2)    | C48-C50 | $\pi^*$    | 32.63 | 0.24 | 0.084 |
| S52     | LP(2)    | C49-C51 | $\pi^*$    | 28.74 | 0.26 | 0.079 |
| S37     | LP(2)    | C1-C2   | $\pi^*$    | 22.23 | 0.27 | 0.069 |
| F73     | LP(3)    | C66-C67 | $\pi^*$    | 20.55 | 0.44 | 0.093 |
| O55     | LP(2)    | C54-O56 | $\sigma^*$ | 34.33 | 0.66 | 0.136 |
| O75     | LP(2)    | C63-C74 | $\sigma^*$ | 21.38 | 0.76 | 0.115 |
| F72     | LP(2)    | C67-C68 | $\sigma^*$ | 6.33  | 1.01 | 0.072 |
| O55     | LP(1)    | C54-O56 | $\sigma^*$ | 1.65  | 1.09 | 0.039 |
| O56     | LP(1)    | C47-C82 | $\sigma^*$ | 0.56  | 1.16 | 0.023 |
| S52     | LP(1)    | C50-C61 | $\sigma^*$ | 0.52  | 1.23 | 0.023 |

**Table S4:** Natural bond orbital (NBO) analysis of investigated compound **NFAD3**-NBO by using M06 6-311G(d,p).

| Donor(i) | Type     | Acceptor(j) | Type       | E(2) <sup>a</sup> | E(J)E(i) <sup>b</sup> (a.u) | F(L,j) <sup>c</sup> (a.u) |
|----------|----------|-------------|------------|-------------------|-----------------------------|---------------------------|
| C48-C50  | $\pi$    | C61-C69     | $\pi^*$    | 31.03             | 0.32                        | 0.089                     |
| C61-C69  | $\pi$    | C75-C76     | $\pi^*$    | 28.91             | 0.29                        | 0.083                     |
| C61-C69  | $\pi$    | C73-O74     | $\pi^*$    | 24.74             | 0.30                        | 0.079                     |
| C66-C67  | $\pi$    | C64-C65     | $\pi^*$    | 19.05             | 0.33                        | 0.071                     |
| C47-C81  | $\pi$    | C49-C51     | $\pi^*$    | 14.59             | 0.32                        | 0.067                     |
| C75-C76  | $\pi$    | C61-C69     | $\pi^*$    | 8.22              | 0.33                        | 0.048                     |
| C73-O74  | $\pi$    | C63-C68     | $\pi^*$    | 4.15              | 0.41                        | 0.041                     |
| C79-N80  | $\pi$    | C77-N78     | $\pi^*$    | 0.75              | 0.47                        | 0.017                     |
| C77-N78  | $\pi$    | C79-N80     | $\pi^*$    | 0.72              | 0.47                        | 0.017                     |
| C61-H62  | $\sigma$ | C50-S52     | $\sigma^*$ | 10.69             | 0.72                        | 0.078                     |
| C76-C77  | $\sigma$ | C77-N78     | $\sigma^*$ | 8.21              | 1.61                        | 0.103                     |
| C49-C81  | $\sigma$ | C49-C51     | $\sigma^*$ | 7.02              | 1.25                        | 0.084                     |
| C47-S53  | $\sigma$ | C81-F82     | $\sigma^*$ | 6.62              | 0.95                        | 0.071                     |
| C14-S36  | $\sigma$ | C11-C12     | $\sigma^*$ | 5.61              | 1.19                        | 0.073                     |
| C2-C3    | $\sigma$ | C3-C5       | $\sigma^*$ | 5.03              | 1.16                        | 0.068                     |
| C12-C13  | $\sigma$ | C11-C12     | $\sigma^*$ | 4.95              | 1.23                        | 0.07                      |
| C11-C12  | $\sigma$ | C10-C18     | $\sigma^*$ | 3.77              | 1.30                        | 0.063                     |
| C63-C64  | $\sigma$ | C64-C75     | $\sigma^*$ | 2.51              | 1.17                        | 0.049                     |
| C68-F94  | $\sigma$ | C63-C64     | $\sigma^*$ | 1.57              | 1.65                        | 0.046                     |

|         |          |         |            |       |      |       |
|---------|----------|---------|------------|-------|------|-------|
| C41-C42 | $\sigma$ | C41-H45 | $\sigma^*$ | 1.29  | 1.12 | 0.034 |
| C12-C13 | $\sigma$ | C9-C32  | $\sigma^*$ | 0.97  | 1.10 | 0.029 |
| C14-S36 | $\sigma$ | C9-C13  | $\sigma^*$ | 0.52  | 1.11 | 0.022 |
| N85     | LP(1)    | C41-C42 | $\pi^*$    | 48.92 | 0.29 | 0.11  |
| O56     | LP(2)    | C54-O55 | $\pi^*$    | 48.65 | 0.37 | 0.121 |
| S53     | LP(2)    | C48-C50 | $\pi^*$    | 32.79 | 0.24 | 0.085 |
| S52     | LP(2)    | C49-C51 | $\pi^*$    | 28.75 | 0.26 | 0.079 |
| S53     | LP(2)    | C47-C81 | $\pi^*$    | 21.45 | 0.26 | 0.067 |
| F71     | LP(3)    | C66-C67 | $\pi^*$    | 20.24 | 0.44 | 0.093 |
| O55     | LP(2)    | C54-O56 | $\sigma^*$ | 34.33 | 0.66 | 0.136 |
| O74     | LP(2)    | C63-C73 | $\sigma^*$ | 23.02 | 0.74 | 0.119 |
| O74     | LP(2)    | C69-C73 | $\sigma^*$ | 17.98 | 0.76 | 0.106 |
| F82     | LP(2)    | C47-C81 | $\sigma^*$ | 7.97  | 1.04 | 0.081 |
| S53     | LP(1)    | C48-C49 | $\sigma^*$ | 2.96  | 1.19 | 0.053 |
| F94     | LP(1)    | C67-C68 | $\sigma^*$ | 1.05  | 1.6  | 0.037 |
| S52     | LP(1)    | C50-C61 | $\sigma^*$ | 0.53  | 1.23 | 0.023 |

**Table S5:** Natural bond orbital (NBO) analysis of investigated compound **NFAD4**-NBO by using M06 6-311G(d,p).

| Donor(i) | Type     | Acceptor(j) | Type       | E(2) <sup>a</sup> | E(J)E(i) <sup>b</sup> (a.u) | F(I,j) <sup>c</sup> (a.u) |
|----------|----------|-------------|------------|-------------------|-----------------------------|---------------------------|
| C48-C49  | $\pi$    | C1-C51      | $\pi^*$    | 28.81             | 0.27                        | 0.083                     |
| C11-C16  | $\pi$    | C6-C7       | $\pi^*$    | 28.61             | 0.29                        | 0.082                     |
| C14-C15  | $\pi$    | C12-C13     | $\pi^*$    | 20.31             | 0.32                        | 0.075                     |
| C6-C7    | $\pi$    | C11-C16     | $\pi^*$    | 19.29             | 0.30                        | 0.068                     |
| C63-C68  | $\pi$    | C71-O72     | $\pi^*$    | 14.14             | 0.32                        | 0.062                     |
| C11-C16  | $\pi$    | C12-C13     | $\pi^*$    | 13.18             | 0.30                        | 0.056                     |
| C47-C79  | $\pi$    | C48-C49     | $\pi^*$    | 11.14             | 0.31                        | 0.058                     |
| C73-C74  | $\pi$    | C64-C65     | $\pi^*$    | 9.86              | 0.31                        | 0.051                     |
| C71-O72  | $\pi$    | C63-C68     | $\pi^*$    | 4.78              | 0.42                        | 0.043                     |
| C54-O55  | $\pi$    | C47-C79     | $\pi^*$    | 3.52              | 0.41                        | 0.037                     |
| C61-H62  | $\sigma$ | C50-S52     | $\sigma^*$ | 11.02             | 0.72                        | 0.079                     |
| C67-C94  | $\sigma$ | C94-N95     | $\sigma^*$ | 8.95              | 1.62                        | 0.108                     |
| C10-C11  | $\sigma$ | C12-S36     | $\sigma^*$ | 7.71              | 0.90                        | 0.075                     |
| C48-C50  | $\sigma$ | C50-C61     | $\sigma^*$ | 6.19              | 1.32                        | 0.081                     |
| C49-C51  | $\sigma$ | C1-C51      | $\sigma^*$ | 5.59              | 1.29                        | 0.076                     |
| C11-C16  | $\sigma$ | C5-C6       | $\sigma^*$ | 4.89              | 1.14                        | 0.067                     |
| C1-C2    | $\sigma$ | C49-C51     | $\sigma^*$ | 4.19              | 1.25                        | 0.065                     |
| C47-C54  | $\sigma$ | C47-C79     | $\sigma^*$ | 3.45              | 1.29                        | 0.06                      |
| C10-C11  | $\sigma$ | C18-H19     | $\sigma^*$ | 2.93              | 1.07                        | 0.05                      |
| C14-C39  | $\sigma$ | C40-C41     | $\sigma^*$ | 1.96              | 1.31                        | 0.045                     |
| C10-C11  | $\sigma$ | C9-C32      | $\sigma^*$ | 0.83              | 1.07                        | 0.027                     |

|         |          |         |            |       |      |       |
|---------|----------|---------|------------|-------|------|-------|
| C71-O72 | $\sigma$ | C63-C64 | $\sigma^*$ | 0.67  | 1.66 | 0.03  |
| C14-S36 | $\sigma$ | C9-C13  | $\sigma^*$ | 0.52  | 1.11 | 0.022 |
| O56     | LP(2)    | C54-O55 | $\pi^*$    | 48.91 | 0.37 | 0.121 |
| S53     | LP(2)    | C48-C49 | $\pi^*$    | 29.67 | 0.26 | 0.081 |
| S37     | LP(2)    | C1-C51  | $\pi^*$    | 20.85 | 0.24 | 0.065 |
| O55     | LP(2)    | C54-O56 | $\sigma^*$ | 34.26 | 0.66 | 0.136 |
| O72     | LP(2)    | C63-C71 | $\sigma^*$ | 22.77 | 0.73 | 0.117 |
| O72     | LP(2)    | C69-C71 | $\sigma^*$ | 17.91 | 0.77 | 0.107 |
| N76     | LP(1)    | C74-C75 | $\sigma^*$ | 12.57 | 1.04 | 0.102 |
| N83     | LP(1)    | C88-H91 | $\sigma^*$ | 5.59  | 0.63 | 0.057 |
| S37     | LP(1)    | C3-C4   | $\sigma^*$ | 2.89  | 1.22 | 0.053 |
| S52     | LP(1)    | C50-C61 | $\sigma^*$ | 0.54  | 1.24 | 0.023 |

**Table S6:** Natural bond orbital (NBO) analysis of investigated compound **NFAD5**-NBO by using M06 6-311G(d,p).

| Donor(i) | Type     | Acceptor(j) | Type       | E(2)  | E(J)E(i) <sup>b</sup> (a.u) | F(I,j) <sup>c</sup> (a.u) |
|----------|----------|-------------|------------|-------|-----------------------------|---------------------------|
| C48-C50  | $\pi$    | C61-C69     | $\pi^*$    | 33.72 | 0.31                        | 0.092                     |
| C61-C69  | $\pi$    | C73-C74     | $\pi^*$    | 30.79 | 0.29                        | 0.084                     |
| C41-C42  | $\pi$    | C39-C40     | $\pi^*$    | 28.82 | 0.29                        | 0.083                     |
| C49-C51  | $\pi$    | C48-C50     | $\pi^*$    | 27.04 | 0.45                        | 0.079                     |
| C39-C40  | $\pi$    | C43-C81     | $\pi^*$    | 24.40 | 0.30                        | 0.077                     |
| C43-C81  | $\pi$    | C41-C42     | $\pi^*$    | 22.13 | 0.30                        | 0.075                     |
| C14-C15  | $\pi$    | C12-C13     | $\pi^*$    | 20.31 | 0.32                        | 0.075                     |
| C47-C79  | $\pi$    | C54-O55     | $\pi^*$    | 19.90 | 0.34                        | 0.075                     |
| C39-C40  | $\pi$    | C41-C42     | $\pi^*$    | 18.41 | 0.29                        | 0.066                     |
| C43-C81  | $\pi$    | C39-C40     | $\pi^*$    | 16.41 | 0.30                        | 0.066                     |
| C14-C15  | $\pi$    | C39-C40     | $\pi^*$    | 10.56 | 0.32                        | 0.055                     |
| C73-C74  | $\pi$    | C64-C65     | $\pi^*$    | 9.91  | 0.31                        | 0.051                     |
| N98-O99  | $\pi$    | C66-C67     | $\pi^*$    | 3.22  | 0.48                        | 0.039                     |
| C61-H62  | $\sigma$ | C50-S52     | $\sigma^*$ | 11.02 | 0.71                        | 0.079                     |
| C74-C77  | $\sigma$ | C77-N78     | $\sigma^*$ | 8.26  | 1.61                        | 0.104                     |
| C50-S52  | $\sigma$ | C48-S53     | $\sigma^*$ | 7.77  | 0.87                        | 0.073                     |
| C14-C15  | $\sigma$ | C9-C13      | $\sigma^*$ | 6.72  | 1.17                        | 0.080                     |
| C47-S53  | $\sigma$ | C79-F80     | $\sigma^*$ | 6.64  | 0.95                        | 0.071                     |
| C48-C50  | $\sigma$ | C50-C61     | $\sigma^*$ | 6.16  | 1.32                        | 0.081                     |
| C14-S36  | $\sigma$ | C11-C12     | $\sigma^*$ | 5.60  | 1.19                        | 0.073                     |
| C47-S53  | $\sigma$ | C48-C50     | $\sigma^*$ | 5.52  | 1.20                        | 0.073                     |
| C39-C81  | $\sigma$ | C14-C39     | $\sigma^*$ | 5.13  | 1.21                        | 0.071                     |
| C14-C15  | $\sigma$ | C13-C15     | $\sigma^*$ | 5.05  | 1.30                        | 0.072                     |
| C13-C15  | $\sigma$ | C9-C13      | $\sigma^*$ | 4.52  | 1.14                        | 0.064                     |
| C13-C15  | $\sigma$ | C11-C12     | $\sigma^*$ | 3.30  | 1.22                        | 0.057                     |
| C48-C50  | $\sigma$ | C49-C79     | $\sigma^*$ | 2.73  | 1.24                        | 0.052                     |
| C13-C15  | $\sigma$ | C15-H38     | $\sigma^*$ | 1.82  | 1.10                        | 0.040                     |
| C14-S36  | $\sigma$ | C9-C13      | $\sigma^*$ | 0.53  | 1.11                        | 0.022                     |
| N92-O93  | $\sigma$ | N92-O94     | $\sigma^*$ | 0.50  | 1.59                        | 0.026                     |
| N83      | LP(1)    | C41-C42     | $\pi^*$    | 49.79 | 0.29                        | 0.110                     |

|      |       |         |            |       |      |       |
|------|-------|---------|------------|-------|------|-------|
| O56  | LP(2) | C54-O55 | $\pi^*$    | 48.97 | 0.37 | 0.121 |
| S53  | LP(2) | C48-C50 | $\pi^*$    | 33.61 | 0.24 | 0.085 |
| F80  | LP(3) | C47-C79 | $\pi^*$    | 25.52 | 0.46 | 0.103 |
| O55  | LP(2) | C54-O56 | $\sigma^*$ | 34.25 | 0.66 | 0.136 |
| O72  | LP(2) | C63-C71 | $\sigma^*$ | 24.16 | 0.72 | 0.12  |
| O96  | LP(2) | N95-O97 | $\sigma^*$ | 20.77 | 0.76 | 0.114 |
| O100 | LP(2) | N98-O99 | $\sigma^*$ | 20.48 | 0.77 | 0.113 |
| O56  | LP(1) | C47-C54 | $\sigma^*$ | 0.50  | 1.03 | 0.020 |

**Table S7:** Natural bond orbital (NBO) analysis of investigated compound **NFAD6**-NBO by using M06 6-311G(d,p).

| Donor(i) | Type     | Acceptor(j) | Type       | E(2)  | E(J)E(i) <sup>b</sup> (a.u) | F(L,j) <sup>c</sup> (a.u) |
|----------|----------|-------------|------------|-------|-----------------------------|---------------------------|
| C61-C69  | $\pi$    | C73-C74     | $\pi^*$    | 30.71 | 0.29                        | 0.084                     |
| C41-C42  | $\pi$    | C39-C40     | $\pi^*$    | 28.67 | 0.29                        | 0.083                     |
| C10-C11  | $\pi$    | C7-C18      | $\pi^*$    | 25.43 | 0.28                        | 0.076                     |
| C39-C40  | $\pi$    | C43-C81     | $\pi^*$    | 24.43 | 0.30                        | 0.077                     |
| C6-C16   | $\pi$    | C10-C11     | $\pi^*$    | 23.38 | 0.30                        | 0.077                     |
| C7-C18   | $\pi$    | C6-C16      | $\pi^*$    | 21.35 | 0.30                        | 0.074                     |
| C14-C15  | $\pi$    | C12-C13     | $\pi^*$    | 20.07 | 0.32                        | 0.075                     |
| C39-C40  | $\pi$    | C14-C15     | $\pi^*$    | 16.63 | 0.28                        | 0.061                     |
| C47-C79  | $\pi$    | C49-C51     | $\pi^*$    | 14.46 | 0.31                        | 0.066                     |
| C14-C15  | $\pi$    | C39-C40     | $\pi^*$    | 10.64 | 0.32                        | 0.055                     |
| C71-O72  | $\pi$    | C63-C68     | $\pi^*$    | 4.36  | 0.42                        | 0.042                     |
| C54-O55  | $\pi$    | C47-C79     | $\pi^*$    | 3.52  | 0.41                        | 0.037                     |
| C61-H62  | $\sigma$ | C50-S52     | $\sigma^*$ | 10.96 | 0.71                        | 0.079                     |
| C74-C77  | $\sigma$ | C77-N78     | $\sigma^*$ | 8.22  | 1.61                        | 0.103                     |
| C47-S53  | $\sigma$ | C79-F80     | $\sigma^*$ | 6.61  | 0.95                        | 0.071                     |
| C49-C51  | $\sigma$ | C48-C49     | $\sigma^*$ | 6.14  | 1.26                        | 0.079                     |
| C14-S36  | $\sigma$ | C11-C12     | $\sigma^*$ | 5.60  | 1.19                        | 0.073                     |
| C49-C51  | $\sigma$ | C1-C51      | $\sigma^*$ | 5.56  | 1.28                        | 0.076                     |
| C43-C81  | $\sigma$ | C42-C43     | $\sigma^*$ | 4.15  | 1.28                        | 0.065                     |
| C3-C4    | $\sigma$ | C2-H8       | $\sigma^*$ | 3.97  | 1.11                        | 0.059                     |
| C10-C11  | $\sigma$ | C9-C10      | $\sigma^*$ | 2.27  | 1.11                        | 0.045                     |
| C1-C2    | $\sigma$ | C2-H8       | $\sigma^*$ | 1.39  | 1.12                        | 0.035                     |
| C3-C4    | $\sigma$ | C5-C20      | $\sigma^*$ | 2.80  | 0.67                        | 0.042                     |
| C14-S36  | $\sigma$ | C9-C13      | $\sigma^*$ | 0.53  | 1.11                        | 0.022                     |
| C77-N78  | $\sigma$ | C73-C74     | $\sigma^*$ | 0.50  | 1.65                        | 0.026                     |
| N83      | LP(1)    | C41-C42     | $\pi^*$    | 49.41 | 0.29                        | 0.110                     |
| O56      | LP(2)    | C54-O55     | $\pi^*$    | 48.88 | 0.37                        | 0.12                      |
| F80      | LP(3)    | C47-C79     | $\pi^*$    | 25.55 | 0.46                        | 0.103                     |
| S36      | LP(2)    | C14-C15     | $\pi^*$    | 24.78 | 0.28                        | 0.074                     |
| S36      | LP(2)    | C12-C13     | $\pi^*$    | 23.69 | 0.29                        | 0.074                     |
| O55      | LP(2)    | C54-O56     | $\sigma^*$ | 34.25 | 0.66                        | 0.136                     |
| O72      | LP(2)    | C63-C71     | $\sigma^*$ | 24.00 | 0.72                        | 0.119                     |
| O55      | LP(1)    | C47-C54     | $\sigma^*$ | 19.78 | 0.73                        | 0.110                     |
| O72      | LP(1)    | C69-C71     | $\sigma^*$ | 17.64 | 0.77                        | 0.106                     |
| S52      | LP(1)    | C49-C51     | $\sigma^*$ | 3.11  | 1.20                        | 0.055                     |
| S52      | LP(1)    | C50-C61     | $\sigma^*$ | 0.55  | 1.24                        | 0.023                     |

F101 LP(1) C66-C94  $\sigma^*$  0.51 1.44 0.025

**Table S8:** Dipole polarizabilities and major contributing tensors (*a.u.*) of the studied compounds (**NFAR1**) and (**NFAD2- NFAD6**).

| Compounds    | $\mu_x$ | $\mu_y$ | $\mu_z$ | $\alpha_{xx}$ | $\alpha_{yy}$ | $\alpha_{zz}$ |
|--------------|---------|---------|---------|---------------|---------------|---------------|
| <b>NFAR1</b> | -1.38   | -1.91   | -0.33   | 2582.24       | 1358.45       | 429.88        |
| <b>NFAD2</b> | 6.47    | -1.09   | 0.01    | 2218.58       | 1173.29       | 411.23        |
| <b>NFAD3</b> | 6.23    | -0.76   | 0.05    | 2253.28       | 1167.94       | 409.17        |
| <b>NFAD4</b> | 8.10    | 2.87    | 0.02    | 2542.74       | 1346.96       | 423.98        |
| <b>NFAD5</b> | 8.31    | 1.95    | -0.06   | 2498.13       | 1272.01       | 473.41        |
| <b>NFAD6</b> | 7.48    | -0.22   | -0.05   | 2410.34       | 1235.42       | 438.85        |

**Table S9:** The computed second-order polarizabilities ( $\beta_{tot}$ ) and major contributing tensors (*a.u.*) of (**NFAR1**) and (**NFAD2- NFAD6**).

| Compounds    | $\beta_{xxx}$ | $\beta_{xyy}$ | $\beta_{xyy}$ | $\beta_{yyy}$ | $\beta_{xxz}$ | $\beta_{yyz}$ | $\beta_{xzz}$ | $\beta_{yzz}$ | $\beta_{zzz}$ |
|--------------|---------------|---------------|---------------|---------------|---------------|---------------|---------------|---------------|---------------|
| <b>NFAR1</b> | -71130.50     | 19364.10      | -3925.58      | -4632.56      | -89.24        | 72.02         | -40.60        | -122.37       | -32.38        |
| <b>NFAD2</b> | 143018.00     | 7718.59       | 823.93        | -3983.63      | 1581.05       | -42.58        | -307.97       | -16.50        | 39.46         |
| <b>NFAD3</b> | 148227.00     | 5309.55       | 265.29        | -3864.88      | 1195.51       | -12.95        | -313.78       | -19.74        | 34.77         |
| <b>NFAD4</b> | 200741.00     | 14538.50      | 11077.30      | 10739.70      | 2615.29       | 212.42        | -298.23       | -26.67        | 29.35         |
| <b>NFAD5</b> | 194095.00     | 112.96        | 9044.79       | 7596.66       | -1972.04      | -162.72       | -441.28       | -3.11         | -38.09        |
| <b>NFAD6</b> | 172101.00     | -11250.60     | 4221.77       | 841.05        | 1873.49       | 174.06        | -356.95       | -13.59        | 38.40         |

**Table S10:** The computed third-order polarizabilities  $\langle\gamma\rangle$  and major contributing tensors (*a.u.*) of (**NFAR1**) and (**NFAD2- NFAD6**).

| Compounds    | $\gamma_x$         | $\gamma_y$         | $\gamma_z$         |
|--------------|--------------------|--------------------|--------------------|
| <b>NFAR1</b> | $1.03 \times 10^7$ | $6.01 \times 10^5$ | $2.40 \times 10^4$ |
| <b>NFAD2</b> | $1.55 \times 10^7$ | $4.76 \times 10^5$ | $1.97 \times 10^4$ |
| <b>NFAD3</b> | $1.66 \times 10^7$ | $4.32 \times 10^5$ | $1.91 \times 10^4$ |
| <b>NFAD4</b> | $3.77 \times 10^7$ | $1.93 \times 10^6$ | $2.00 \times 10^4$ |
| <b>NFAD5</b> | $3.41 \times 10^7$ | $1.76 \times 10^6$ | $1.96 \times 10^4$ |
| <b>NFAD6</b> | $2.38 \times 10^7$ | $1.03 \times 10^6$ | $1.76 \times 10^4$ |
